# Supplementary material for: GIGYF1 loss of function is associated with clonal mosaicism and adverse metabolic health
Source: PubMed Central journal article supplement (PMC8263756; doi:10.1038/s41467-021-24504-y), 2021-07-07

**Supplementary Information for “*GIGYF1* loss of function is associated with clonal mosaicism and adverse metabolic health”**

Yajie Zhao<sup>1</sup>, Stasa Stankovic<sup>1</sup>, Mine Koprulu<sup>1</sup>, Eleanor Wheeler<sup>1</sup>, Felix R Day<sup>1</sup>, Hana Lango Allen<sup>1</sup>, Nicola D Kerrison<sup>1</sup>, Maik Pietzner<sup>1</sup>, Po-Ru Loh<sup>2,3</sup>, Nicholas J Wareham<sup>1</sup>, Claudia Langenberg<sup>1</sup>, Ken K Ong<sup>1</sup> and John R.B. Perry<sup>1</sup>

**Figure S1 | Relationship between bioinformatically predicted function and LOY association for *GIGYF1* and *CHEK2* moderate-impact variants.** Y-axis shows the PAR-LOYq association of each variant assessed by absolute Z-score divided by minor allele count.

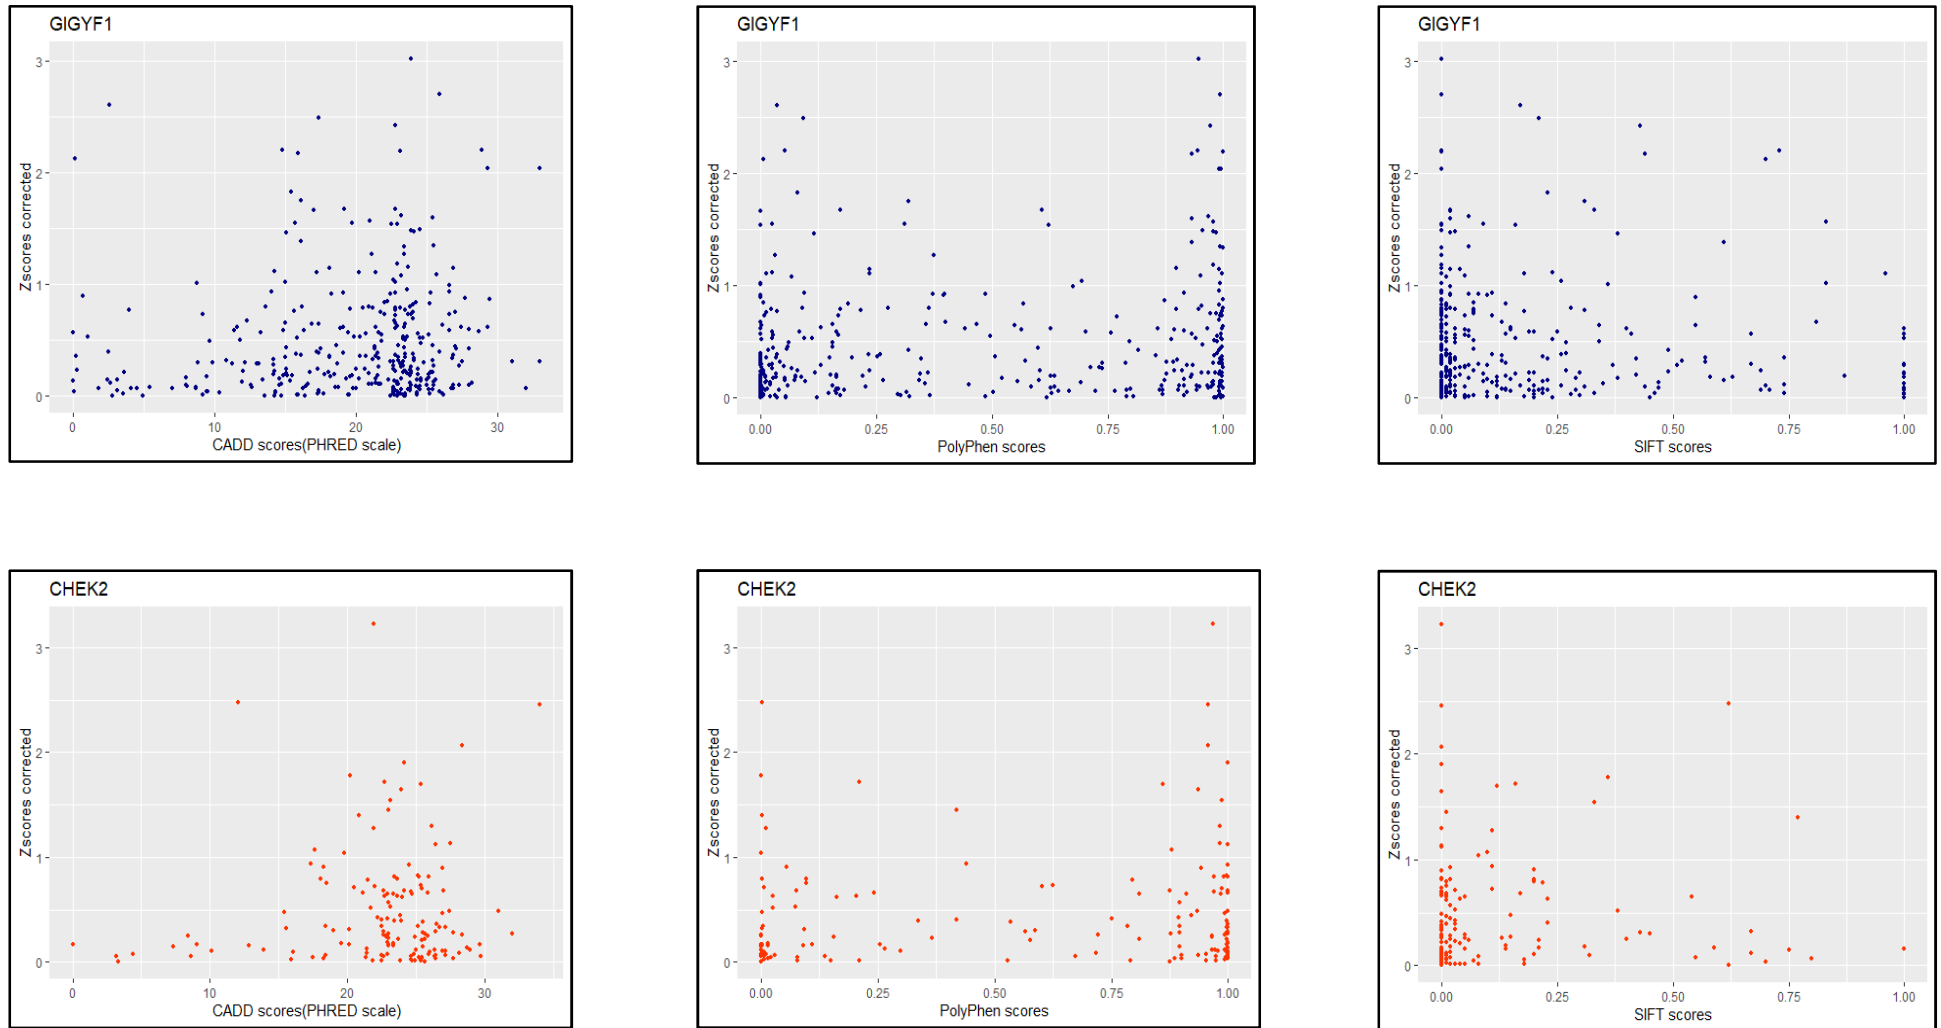

**Figure S2 | Impact of GIGYF1 loss of function carriers on genetically-defined principal components.** GIGYF1 carriers are highlighted in red, all other analysed samples in black. Analysis performed in maximum available sample-size (N=184,972).

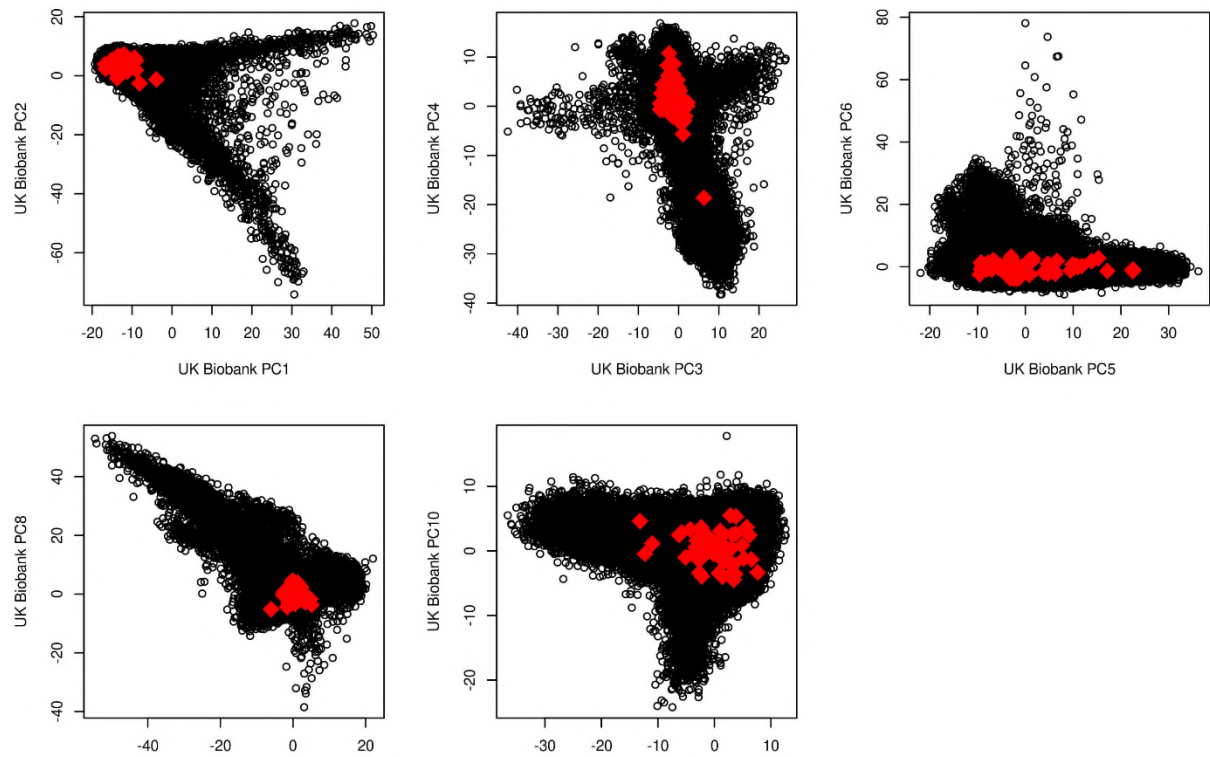

**Figure S3 | Geographical distribution of GIGYF1 loss of function carriers by location of birth.**  
GIGYF1 carriers are highlighted in red, all other analysed samples in black. Analysis performed in maximum available sample-size (N=184,972).

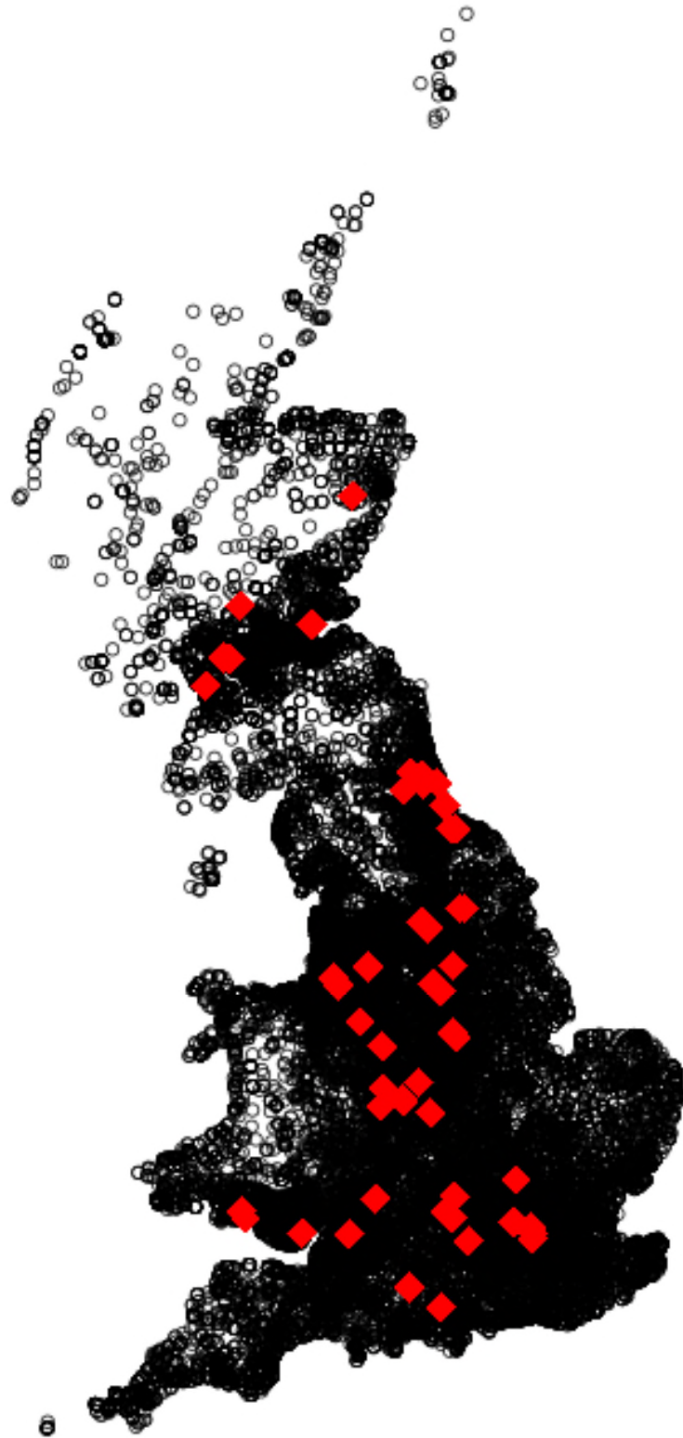

**Figure S4 | Regional association of common variants with Type 2 Diabetes, LOY and related traits in the region around GIGYF1 (+/- 500kb).** Highlighted variants are the lead variant associated with T2D r2221781 (red) and lead eQTL for GIGYF1 rs221792 (purple).

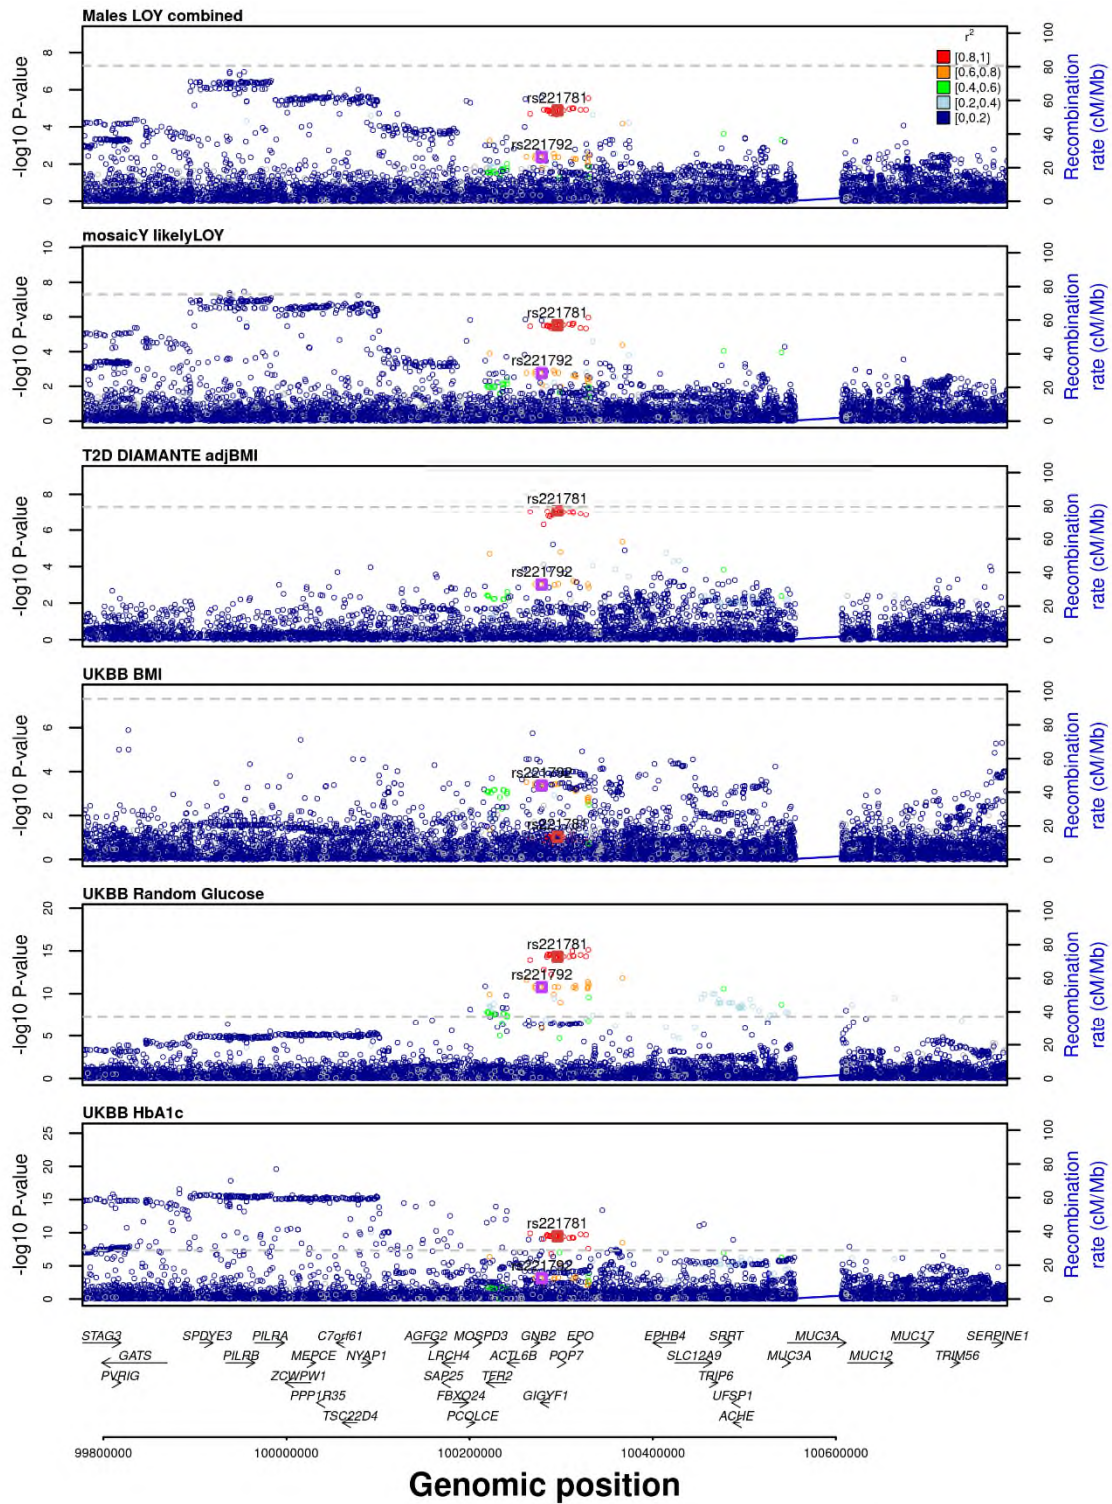



**Figure S5 | Multi-tissue eQTL associations in GTEx for common variant rs221781.** The solid pink line represents the null effect. Each square represents the beta estimate from a linear regression model of the variant against mRNA transcript abundance. Test statistic is a two-sided P-value and no correction for multiple testing has been made.

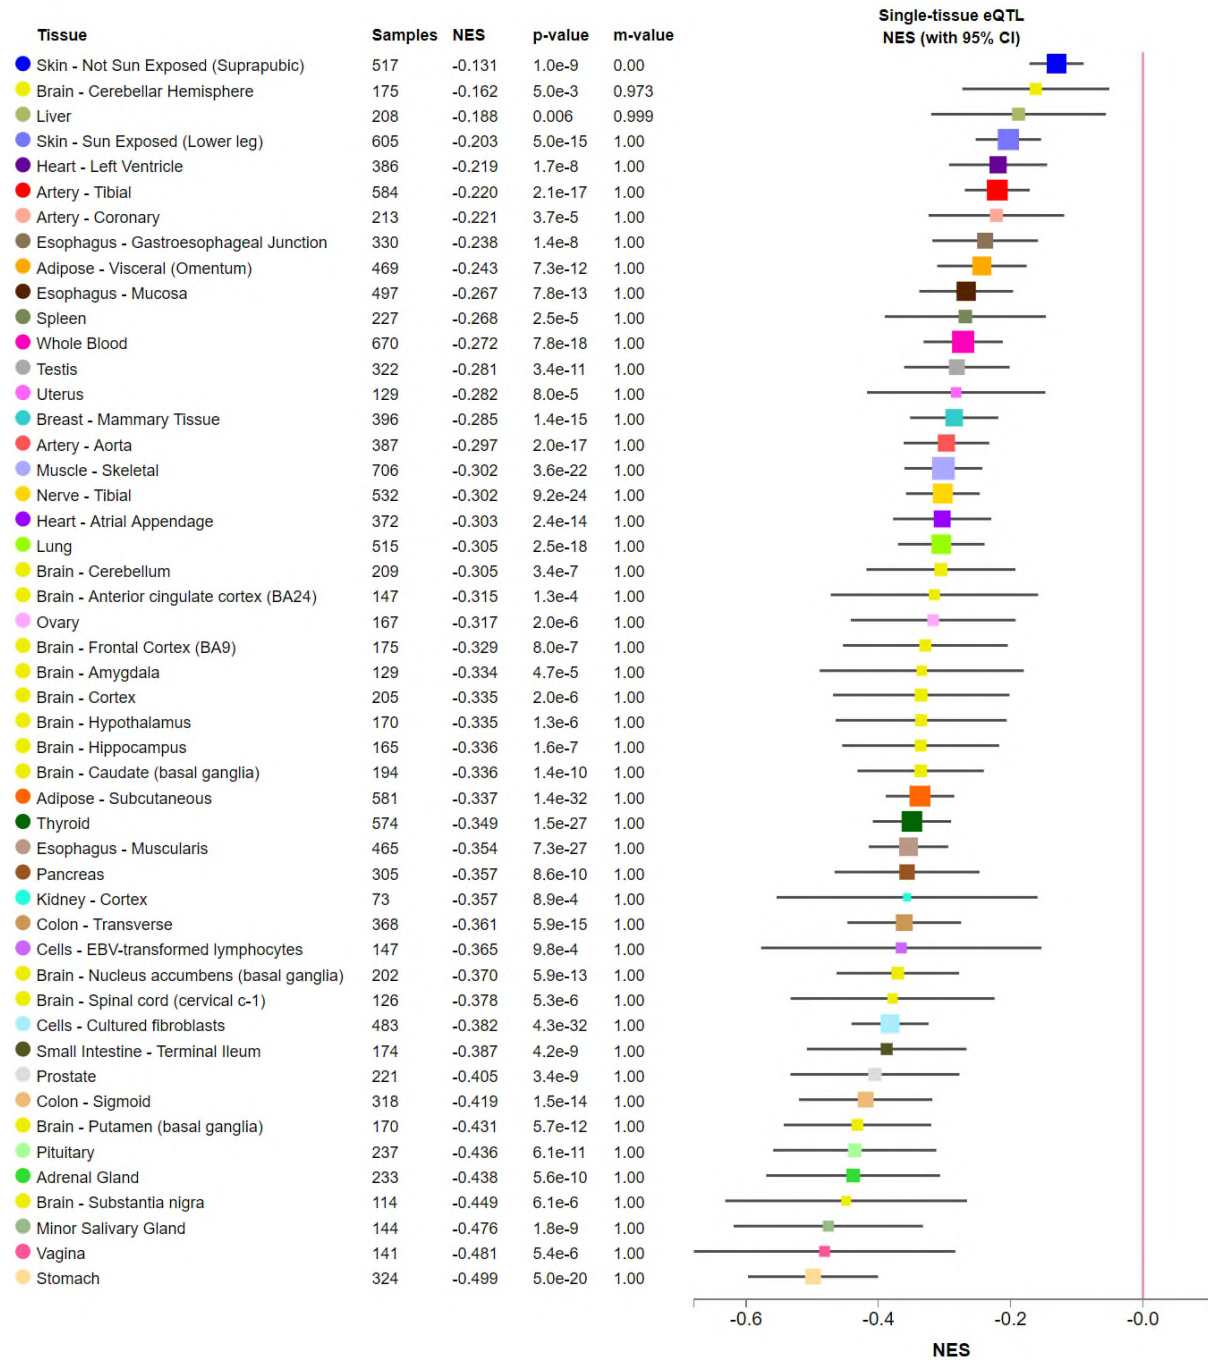

Supplement: 41467_2021_24504_MOESM1_ESM.pdf [file 41467_2021_24504_MOESM1_ESM.pdf]
